# Supplementary material
Source: PubMed Central journal article supplement (PMC8521684)
Supplement: pnas.2108276118.sapp.pdf [file pnas.2108276118.sapp.pdf]

**Supplementary Information for**

**Cis-acting lnc-Cxcl2 restrains neutrophil-mediated lung inflammation by inhibiting epithelial cell CXCL2 expression in virus infection**

Shuo Liu<sup>a, b</sup>, Jiaqi Liu<sup>b</sup>, Xue Yang<sup>b</sup>, Minghong Jiang<sup>b</sup>, Qingqing Wang<sup>a</sup>, Lianfeng Zhang<sup>c</sup>, Yuanwu Ma<sup>c</sup>, Zhongyang Shen<sup>d</sup>, Zhigang Tian<sup>e</sup>, Xuetao Cao<sup>a, b, f, \*</sup>

<sup>a</sup>Institute of Immunology, Zhejiang University School of Medicine, Hangzhou 310058, China

<sup>b</sup> Department of Immunology, Institute of Basic Medical Sciences, Peking Union Medical College, Chinese Academy of Medical Sciences, Beijing 100005, China

<sup>c</sup> Institute of Laboratory Animal Sciences, Chinese Academy of Medical Sciences, Beijing 100021, China

<sup>d</sup> Institute of Transplantation Medicine, Tianjin First Central Hospital, Nankai University, Tianjin 300070, China

<sup>e</sup> Institute of Immunology, School of Life Sciences and Medical Center, University of Science and Technology of China, Hefei, Anhui 230027, China

<sup>f</sup> College of Life Sciences, Nankai University, Tianjin 300071, China

\* To whom correspondence may be addressed. Email: caoxt@immunol.org

**This PDF file includes:**

Supplementary text (Materials and Methods)

SI References

Figures S1 to S6

Tables S1 to S6

## Supplementary text

### Materials and Methods

#### Plasmids, reagents and virus

cDNA fragments of La were amplified from MLE-12 cells cDNA, and then were cloned into pcDNA3.1 vector.

BAY 11-7082, BAY 11-7085, QNZ (EVP4593) were from Selleck. ELISA kits detecting mouse CXCL2 and CCL2 were from R&D Systems. Anti-La (D19B3), Anti-P65 (D14E12), Anti-P50 (D4P4D), Anti-STAT1 (D1K9Y), Anti-STAT3 (124H6), Anti-c-JUN (60A8), Anti-EZH2 (D2C9), Anti-Flag (D6W5B), Anti-Lamin A/C (4C11), Anti-H3K4me3 (C42D8), Anti-CBP (D6C5), Anti-Rpb1 CTD (4H8), Anti-P-Rpb1 CTD (Ser2) (E1Z3G) and Normal rabbit IgG antibodies were from Cell Signaling Technology. Anti-GAPDH (3H12) and Anti-Actin (6D1) antibodies were from MBL. Anti-Gr-1 (EPR22909-135) antibody was from Abcam. PE anti-mouse CD45 (30-F11), APC anti-mouse Ep-CAM (G8.8), PerCP/Cy5.5 anti-mouse CD11c (N418), FITC anti-mouse Siglec-F (S17007L), PE/Cy7 anti-mouse NK1.1 (PK136), APC anti-mouse CD11b (M1/70), FITC anti-mouse Gr-1 (RB6-8C5), FITC anti-mouse I-A/I-E (M5/114.15.2) antibodies were from BioLegend. APC CD4 Monoclonal Antibody (RM4-5), APC CD19 Monoclonal Antibody (eBio1D3 (1D3)) and PE F4/80 Monoclonal Antibody (BM8) were from Thermo Scientific. PE Rat Anti-Mouse CD8a (53-6.7) antibody was from BD Pharmingen.

GFP-VSV and VSV were amplified using HEK293T cells. Influenza virus strain A/Puerto Rico/8/1981 H1N1 (PR8) was amplified using VERO cells in VP-SFM

(Thermo Scientific) supplemented with 4 mM glutamine and 1 µg/mL TPCK-treated trypsin (Sigma-Aldrich). Viral titers were determined by plaque assay.

### **Mouse primary alveolar epithelial cells, resident alveolar macrophages and trachea epithelial cells isolation**

Mouse primary alveolar epithelial cells (AECs), resident alveolar macrophages (AMs) and trachea epithelial cells (TECs) were isolated according to the published protocol (1, 2) with some modifications. Briefly, mouse lung was digested using 50 U/mL Dispase (Roche) at room temperature for more than 45 min, then cells were collected for antibody labeling and cell sorting. FSC<sup>hi</sup>SSC<sup>hi</sup>, singlet, CD45<sup>-</sup>EPCAM<sup>+</sup> cells were sorted as AECs, CD45<sup>+</sup>CD11c<sup>+</sup>Siglec-F<sup>+</sup> cells were sorted as AMs. Mouse tracheas were separated and cut along the vertical axis, then were digested in 0.15% Pronase (Roche) overnight at 4 °C. On the second day, cells were collected and incubated in plates at 37 °C for 5 h, after that the suspended cells were collected as TECs.

### **Quantitative PCR**

Total RNA was extracted using Trizol reagent (Thermo Scientific), cDNA was synthesized using ReverTra Ace qPCR RT Master Mix (TOYOBO). For Inc-Cxcl2 detection, RNA was treated with DNase I and extracted again to remove genome contamination, oligo(dT) was used to synthesize cDNA.

SYBR Green Realtime PCR Master Mix (TOYOBO) was used for quantitative PCR (q-PCR). Each sample data was normalized to its RPL32 expression. Primers used

for q-PCR analysis were listed in *SI Appendix*, Table S5.

### **Transcriptome analysis**

*lnc-Cxcl2*<sup>+/+</sup> and *lnc-Cxcl2*<sup>-/-</sup> MLE-12 cells or siRNA-transfected A549 cells were infected with VSV or IAV for 12 h. Then mRNAs from these cells were purified and the libraries were generated. RNA-seq was performed on Illumina platform. Obtained clean reads were aligned to the reference genome using Hisat2 v2.0.5, and featureCounts v1.5.0-p3 was used to count the reads numbers mapped to each gene.  $|\log_2\text{Fold Change}| > 1$  and adjusted  $p$  value ( $\text{padj}$ )  $< 0.05$  were used to define differentially expressed genes. The sequencing data were deposited in NCBI GEO under accession code GSE156949 and GSE179951.

### **DNase I sensitivity assay**

Wild-type, *lnc-Cxcl2*-deficient, or *La*-deficient MLE-12 cells were uninfected or infected with VSV for 12 h, then the cells were collected and treated with DNase I for 30 min at 37 °C. Genomic DNA was extracted from these cells and quantified by q-PCR. Genomic DNA from cells not treated with DNase I was also extracted and used as the input control. Primers used to detect different promoter regions by q-PCR analysis were listed in *SI Appendix*, Table S5.

### **Chromatin immunoprecipitation**

Chromatin immunoprecipitation (ChIP) analysis was performed using SimpleChIP

Enzymatic Chromatin IP Kit (Cell Signaling Technology) according to the manufacturer's instructions. Briefly, cells were cross-linked with 1% formaldehyde followed by micrococcal nuclease digestion. 10 µg digested chromatin was used as one sample and incubated with antibody overnight at 4 °C, then protein G magnetic beads were added for another two hours' incubation. After washing for four times, chromatin DNA was eluted from beads and quantified by q-PCR. Primers used to detect different promoter regions by q-PCR analysis were listed in *SI Appendix*, Table S5.

### **RNA pull-down assay**

Biotin-labeled lnc-Cxcl2 or lnc-CXCL2-4-1 was obtained by *in vitro* transcription and was crosslinked with M280 Streptavidin magnetic beads (Thermo Scientific) for 15 min at room temperature. MLE-12 or A549 cells were lysed using IP lysis buffer (Thermo Scientific), and then the protein lysate was added to the RNA-bound beads and incubated in protein-RNA binding buffer (20 mM Tris-HCl at pH 7.5, 50 mM NaCl, 2 mM MgCl<sub>2</sub>, 0.1% Tween-20 Detergent) for 1 h at 4 °C. After incubation, beads were washed four times with wash buffer (20 mM Tris-HCl at pH 7.5, 10 mM NaCl, 0.1% Tween-20 Detergent), captured proteins were isolated by heating in SDS loading buffer and detected by immunoblot analysis. For MS analysis, nuclear proteins of MLE-12 cells were used in pull-down assay.

### **RNAi**

siRNAs were transfected into MLE-12 cells or A549 cells using Lipofectamine

RNAiMAX Reagent (Thermo Scientific) according to the manufacturer's instructions. After transfection for 24 h, cells were infected with VSV or IAV for indicated hours followed by RNA extraction for cytokine expression analysis or DNase I treatment for chromatin accessibility analysis. For silencing each mRNA, a mixture of three siRNAs was used, for silencing each lncRNA, a mixture of three siRNAs and three ASOs was used. The target sequences of siRNAs were listed in *SI Appendix*, Table S6.

### **RNA immunoprecipitation**

MLE-12 cells were lysed in lysis buffer (10mM HEPES-NaOH at pH 7.5, 100 mM KCl, 5 mM MgCl<sub>2</sub> and 1% NP-40), and the supernatants were collected and incubated with antibodies overnight. Dynabeads Protein G (Thermo Scientific) were washed with NT2 buffer (50 mM Tris-HCl at pH 7.5, 150 mM NaCl, 1 mM MgCl<sub>2</sub> and 0.05% NP-40) and added into supernatants for 2 h' incubation. Then the beads were washed five times with NT2 buffer, RNA was eluted using Proteinase K and isolated for q-PCR analysis. Primers used for q-PCR analysis were listed in *SI Appendix*, Table S5.

## SI References

1. H. C. Lam, A. M. Choi, S. W. Ryter, Isolation of mouse respiratory epithelial cells and exposure to experimental cigarette smoke at air liquid interface. *J. Vis. Exp.*, 2513 (2011).
2. M. Sinha, C. A. Lowell, Isolation of highly pure primary mouse alveolar epithelial type II cells by flow cytometric cell sorting. *Bio. Protoc.* **6**, e2013 (2016).

## Supplementary Figures

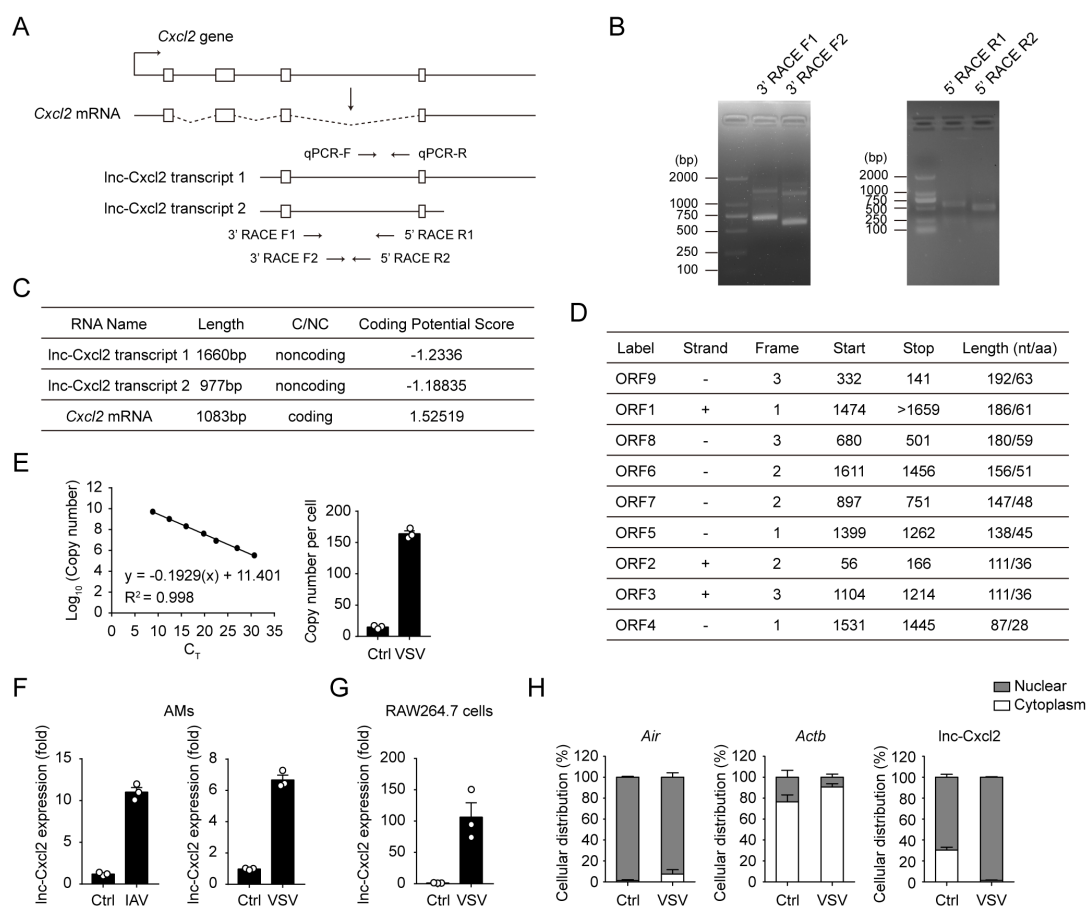

**Fig. S1. lnc-Cxcl2 expression is increased in the nucleus of mouse lung epithelial cells in response to viral infection.**

(A) Schematic illustration of genomic locations of lnc-Cxcl2 transcripts and primers used to detect lnc-Cxcl2. (B) RACE analysis of lnc-Cxcl2 in MLE-12 cells infected with VSV (MOI = 1) for 12 h. (C) Coding potential analysis of lnc-Cxcl2 using Coding Potential Calculator. (D) Coding potential analysis of lnc-Cxcl2 using NCBI Open Reading Frame Finder (<http://www.ncbi.nlm.nih.gov/orffinder/>). (E) Standard curve generated using plasmid expressing lnc-Cxcl2 (left), and q-PCR analysis of the copy number of lnc-Cxcl2 in MLE-12 cells infected with VSV (MOI = 1) for 12 h (right).



(F) q-PCR analysis of lnc-Cxcl2 expression in AMs infected with IAV (MOI = 1) or VSV (MOI = 1) for 12 h. (G) q-PCR analysis of lnc-Cxcl2 expression in RAW264.7 cells infected with VSV (MOI = 1) for 6 h. (H) q-PCR analysis of *Air*, *Actb* mRNAs and lnc-Cxcl2 expressions in nucleus and cytoplasm of MLE-12 cells infected with VSV (MOI = 1) for 12 h. Data are representative of three independent experiments with  $n = 3$  biological replicates (E-G; shown as mean + SEM) or from three independent experiments (H; shown as mean + SEM).

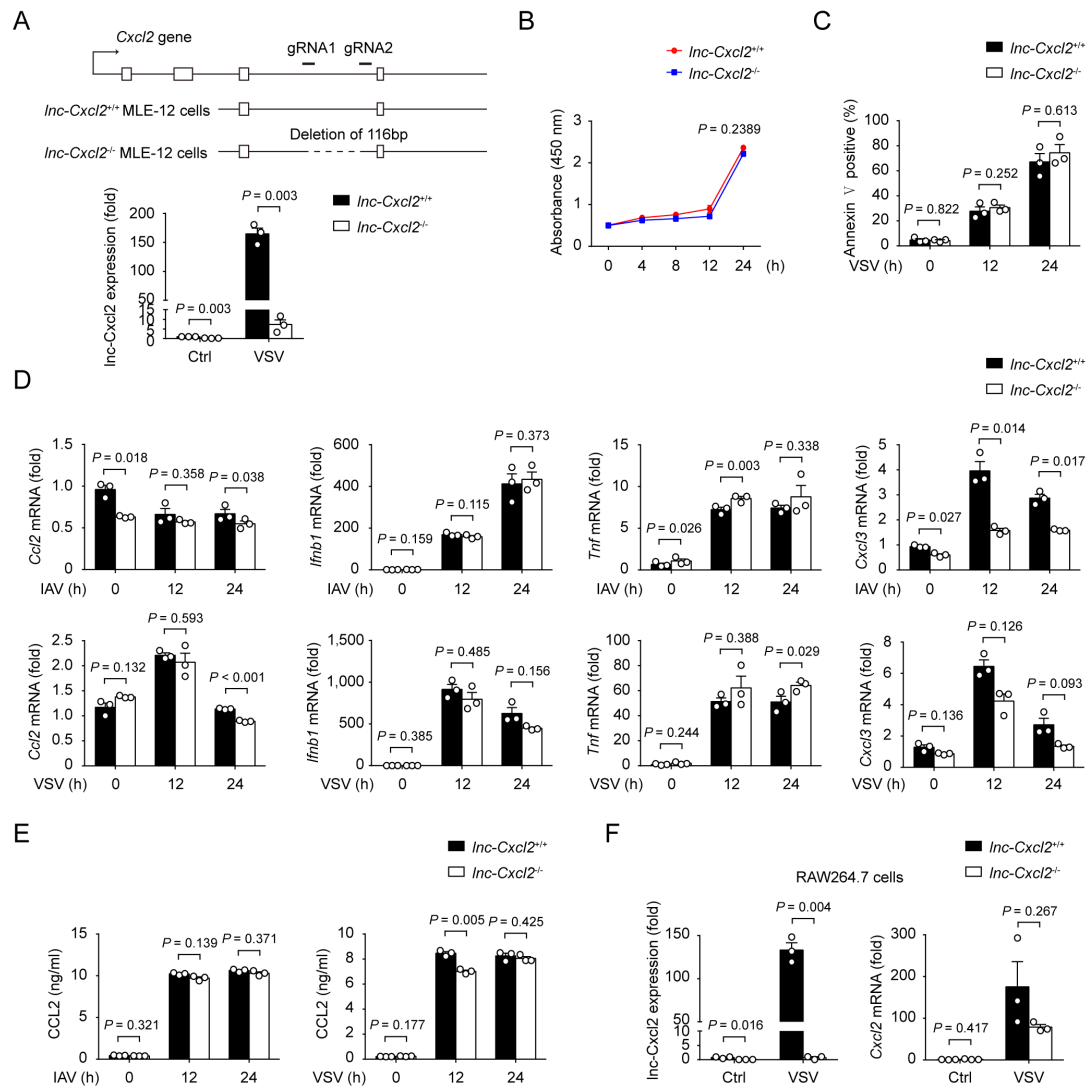

**Fig. S2. Inc-Cxcl2 selectively inhibits Cxcl2 expression in lung epithelial cells during viral infection.**

(A) Schematic illustration of the generation of *Inc-Cxcl2*<sup>-/-</sup> MLE-12 cells (top), q-PCR analysis of *Inc-Cxcl2* expression in *Inc-Cxcl2*<sup>+/+</sup> and *Inc-Cxcl2*<sup>-/-</sup> MLE-12 cells infected with VSV (MOI = 1) for 12 h (bottom). (B) CCK-8 (Cell counting kit) assay of cell proliferation of *Inc-Cxcl2*<sup>+/+</sup> and *Inc-Cxcl2*<sup>-/-</sup> MLE-12 cells within indicated hours. (C) Flow cytometric analysis of cell death of *Inc-Cxcl2*<sup>+/+</sup> and *Inc-Cxcl2*<sup>-/-</sup> MLE-12 cells infected with VSV (MOI = 1) for indicated hours. (D) q-PCR analysis of *Ccl2*, *Ifnb1*,

*Tnf* and *Cxcl3* mRNA expressions in *lnc-Cxcl2*<sup>+/+</sup> and *lnc-Cxcl2*<sup>-/-</sup> MLE-12 cells infected with IAV (MOI = 1) or VSV (MOI = 1) for indicated hours. (E) ELISA of CCL2 level in the supernatant of *lnc-Cxcl2*<sup>+/+</sup> and *lnc-Cxcl2*<sup>-/-</sup> MLE-12 cells infected with IAV (MOI = 1) or VSV (MOI = 1) for indicated hours. (F) q-PCR analysis of *lnc-Cxcl2* and *Cxcl2* mRNA expressions in *lnc-Cxcl2*<sup>+/+</sup> and *lnc-Cxcl2*<sup>-/-</sup> RAW264.7 cells infected with VSV (MOI = 1) for 6 h. Data are representative of three independent experiments with  $n = 3$  biological replicates (C-F; shown as mean + SEM), two-tailed unpaired Student's *t*-test, or three independent experiments with  $n = 6$  biological replicates (B; shown as mean  $\pm$  SEM), two-way ANOVA analysis.

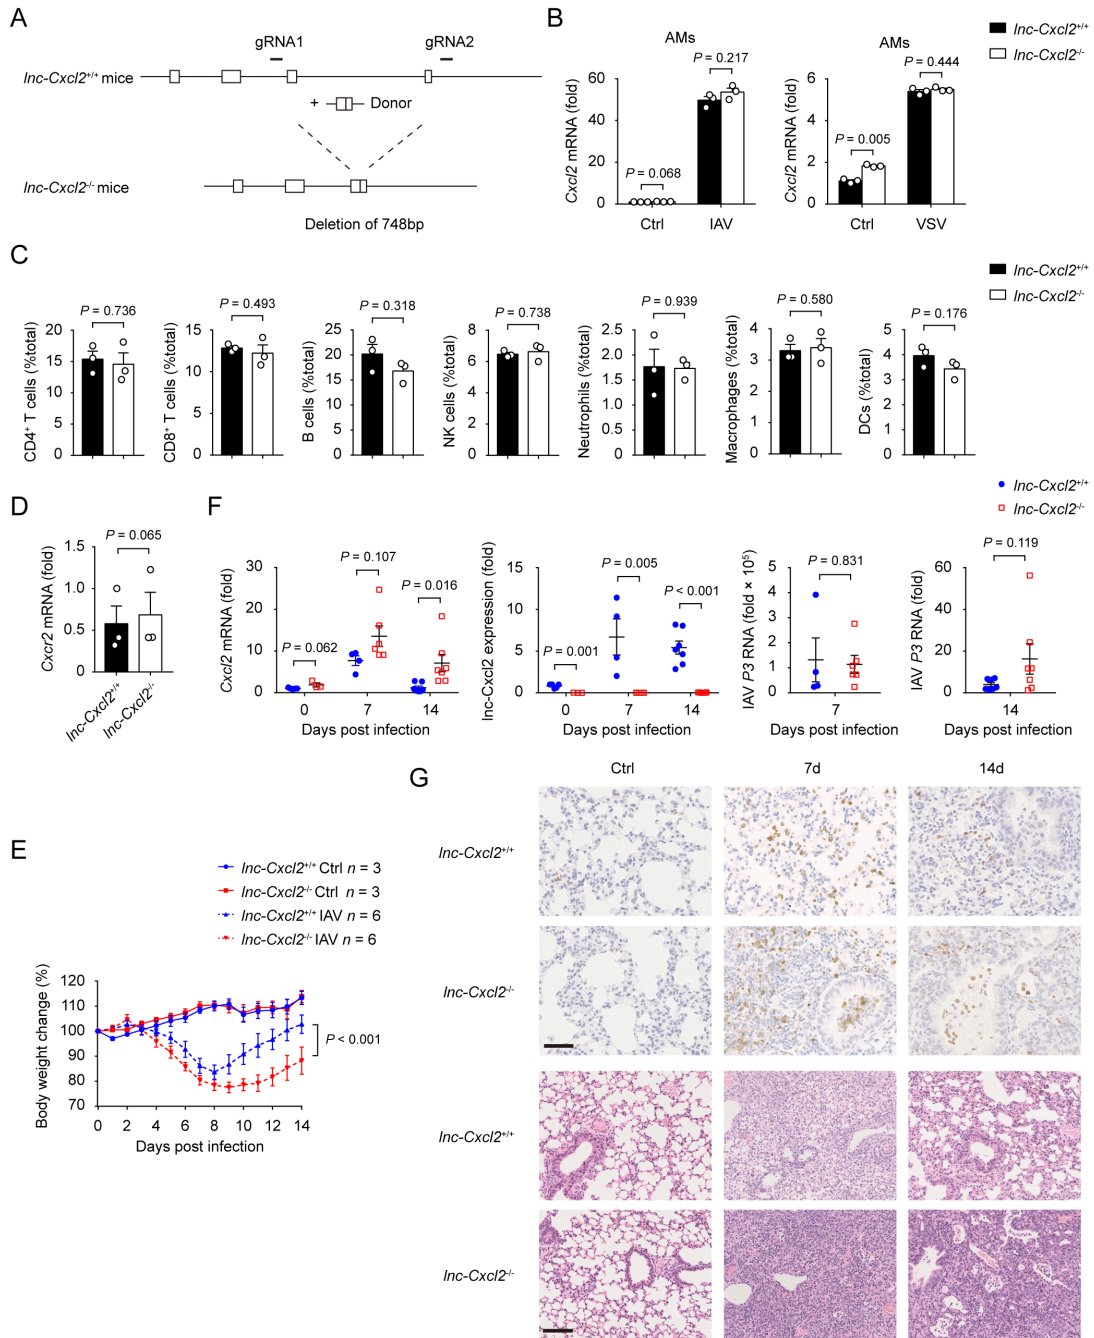

**Fig. S3. *Inc-Cxcl2* restrains influenza virus-induced lung inflammation *in vivo*.**

(A) Schematic illustration of the generation of *Inc-Cxcl2*<sup>-/-</sup> mice. (B) q-PCR analysis of *Cxcl2* mRNA expression in AMs from *Inc-Cxcl2*<sup>+/+</sup> and *Inc-Cxcl2*<sup>-/-</sup> mice infected with IAV (MOI = 1) or VSV (MOI = 1) for 12 h. (C) Flow cytometric analysis of the propagations of CD4<sup>+</sup> T cells, CD8<sup>+</sup> T cells, CD19<sup>+</sup> B cells, NK1.1<sup>+</sup> NK cells,

CD11b<sup>+</sup>Gr-1<sup>+</sup> neutrophils, CD11b<sup>+</sup>F4/80<sup>+</sup> macrophages, and CD11c<sup>+</sup>MHC II<sup>+</sup> DCs in the spleen from *lnc-Cxcl2*<sup>+/+</sup> and *lnc-Cxcl2*<sup>-/-</sup> mice. (D) q-PCR analysis of *Cxcr2* mRNA expression in bone marrow neutrophils from *lnc-Cxcl2*<sup>+/+</sup> and *lnc-Cxcl2*<sup>-/-</sup> mice. (E) Body weight change analysis of *lnc-Cxcl2*<sup>+/+</sup> and *lnc-Cxcl2*<sup>-/-</sup> mice intranasally infected with IAV (50 PFU) for two weeks. (F) q-PCR analysis of *Cxcl2* mRNA and *lnc-Cxcl2* expressions and IAV load indicated by virus polymerase P3 expression in lungs from *lnc-Cxcl2*<sup>+/+</sup> and *lnc-Cxcl2*<sup>-/-</sup> mice intranasally infected with IAV (50 PFU) for indicated times. (G) Immunohistochemistry staining of Gr-1<sup>+</sup> neutrophils (top) and hematoxylin- and eosin staining (bottom) of lung sections from mice described in (F). Scale bar, 50  $\mu$ m (top) or 100  $\mu$ m (bottom). Data are representative of three independent experiments with  $n = 3$  biological replicates (B-D; shown as mean + SEM), from two independent experiments with 3 or 6 mice per group (E; shown as mean  $\pm$  SEM) or pooled from four independent experiments with 3 to 7 mice per group (F and G; shown as mean + SEM in F), two-tailed unpaired Student's *t*-test (B-D, F), two-way ANOVA analysis (E).

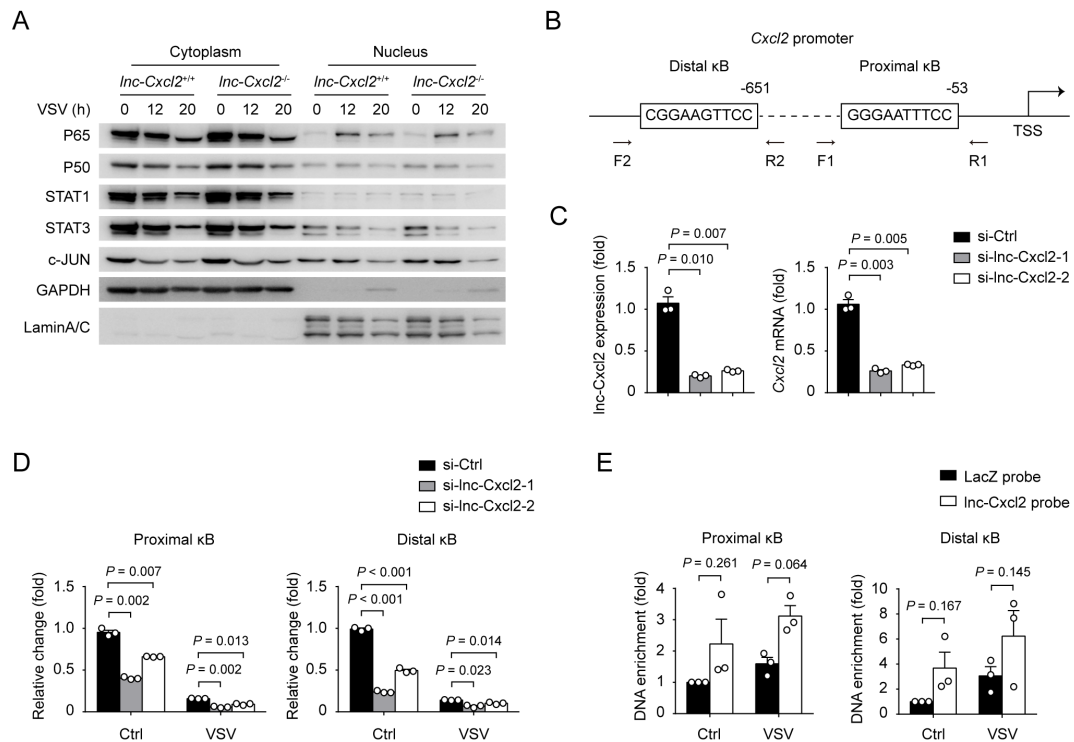

**Fig. S4. *Inc-Cxcl2* binds to and maintains the repressed chromatin state of *Cxcl2* promoter *in cis*.**

(A) Immunoblot analysis of the indicated transcription factors in the cytoplasm and nucleus of *lnc-Cxcl2*<sup>+/+</sup> and *lnc-Cxcl2*<sup>-/-</sup> MLE-12 cells infected with VSV (MOI = 1) for indicated hours. (B) Schematic illustration of two κB sites and primer locations in *Cxcl2* promoter. (C) q-PCR analysis of *lnc-Cxcl2* and *Cxcl2* mRNA expressions in MLE-12 cells transfected with negative ctrl siRNA or *lnc-Cxcl2* siRNA. (D) q-PCR analysis of the DNase I sensitivity of *Cxcl2* promoters in MLE-12 cells transfected with negative ctrl siRNA or *lnc-Cxcl2* siRNA by VSV infection (MOI = 1) for 12 h. (E) q-PCR analysis of enrichment level of *Cxcl2* promoter that purified by *lnc-Cxcl2* probes in MLE-12 cells infected with VSV (MOI = 1) for 12 h. Data are representative of three independent experiments (A), three independent experiments with  $n = 3$  biological

replicates (*C* and *D*; shown as mean + SEM) or from three independent experiments (*E*; shown as mean + SEM), two-tailed unpaired Student's *t*-test.

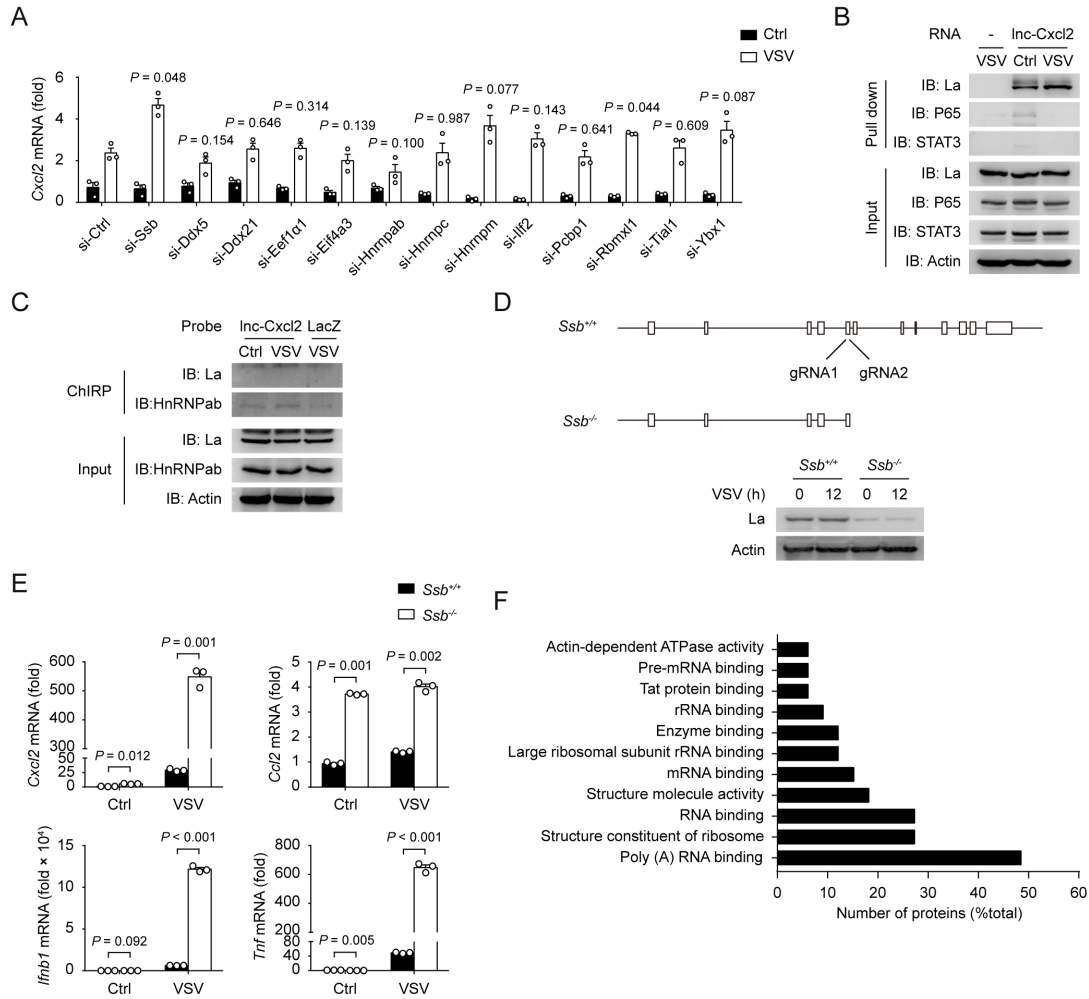

**Fig. S5. Inc-Cxcl2 inhibits *Cxcl2* expression through ribonucleoprotein La.**

(A) q-PCR analysis of the *Cxcl2* mRNA expression in MLE-12 cells transfected with negative ctrl siRNA or siRNAs targeting indicated mRNAs (50 nM) followed by VSV infection (MOI = 1) for 12 h. (B) Immunoblot analysis of Inc-Cxcl2 and La interaction in MLE-12 cells infected with VSV (MOI = 1) for 12 h. (C) Immunoblot analysis of proteins purified by Inc-Cxcl2 probes in RAW264.7 cells infected with VSV (MOI = 1) for 6 h. (D) Schematic illustration of the generation of *Ssb*<sup>-/-</sup> MLE-12 cells (top) and immunoblot analysis of La protein level in *Ssb*<sup>+/+</sup> and *Ssb*<sup>-/-</sup> MLE-12 cells infected with VSV (MOI = 1) for 12 h (bottom). (E) q-PCR analysis of *Cxcl2*, *Ccl2*, *Ifnb1*, and *Tnf*



mRNA expressions in *Ssb*<sup>+/+</sup> and *Ssb*<sup>-/-</sup> MLE-12 cells infected with VSV (MOI = 1) for 12 h. (F) Gene ontology analysis of the molecular functions of La-interacting proteins. *P* value < 0.05. Data are representative of three independent experiments (*B* and *C*) or three independent experiments with *n* = 3 biological replicates (*A* and *E*; shown as mean + SEM), two-tailed unpaired Student's *t*-test.

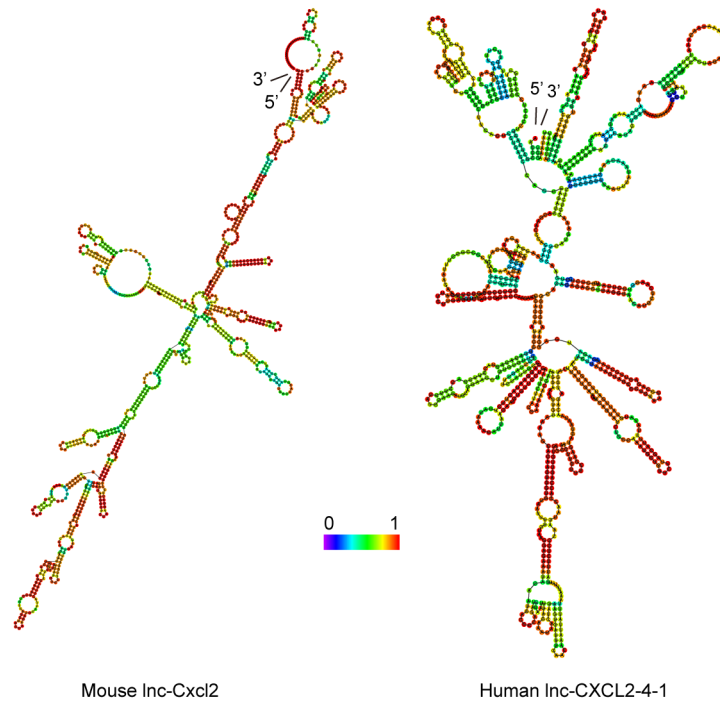

**Fig. S6. Secondary structure of mouse lnc-Cxcl2 and human lnc-CXCL2-4-1.**

Secondary structure prediction of mouse lnc-Cxcl2 and human lnc-CXCL2-4-1 by RNAfold web server (<http://rna.tbi.univie.ac.at/cgi-bin/RNAWebSuite/RNAfold.cgi>).

The minimum free energy structures are colored by base-pairing probabilities.

## Supplementary Tables

**Table S1. Sequence of lnc-Cxcl2 determined by RACE.**

---

|                                                                                                                                                                                                                                                                                                                                                                                                                                                                                                                                                                                                                                                                                                                                                                                                                                                                                                                                                                                                                                                                                                                                                                                                                                                                                                                                                                                                                                                                                                                                                                                                                                                                                                                                                                                                                                                                             |
|-----------------------------------------------------------------------------------------------------------------------------------------------------------------------------------------------------------------------------------------------------------------------------------------------------------------------------------------------------------------------------------------------------------------------------------------------------------------------------------------------------------------------------------------------------------------------------------------------------------------------------------------------------------------------------------------------------------------------------------------------------------------------------------------------------------------------------------------------------------------------------------------------------------------------------------------------------------------------------------------------------------------------------------------------------------------------------------------------------------------------------------------------------------------------------------------------------------------------------------------------------------------------------------------------------------------------------------------------------------------------------------------------------------------------------------------------------------------------------------------------------------------------------------------------------------------------------------------------------------------------------------------------------------------------------------------------------------------------------------------------------------------------------------------------------------------------------------------------------------------------------|
| lnc-Cxcl2 transcript 1 (5'-3')                                                                                                                                                                                                                                                                                                                                                                                                                                                                                                                                                                                                                                                                                                                                                                                                                                                                                                                                                                                                                                                                                                                                                                                                                                                                                                                                                                                                                                                                                                                                                                                                                                                                                                                                                                                                                                              |
| TGCCCAGACCCTCCTGCCGCCCCATGCTCACCTAAAGAAACCTCGTGCCTTATA<br>ATGATCCCCACATCTCTCTGCAGAGCCACTCTCAAGGGCGGTCAAAAAGTTTGC<br>CTTGACCCTGAAGCCCCCTGGTTCAGAAAATCATCCAAAAGATACTGAACAAG<br>TGAGTCGCGATTTGTGCTTACACCTGACTGGCACCCGATTTCTGAAAATTATAGC<br>AGGGAAAATCAAGGTTAACTTCAGTTCAGGAACCTGAATTATTATTTTCATTGTT<br>AACTTTGTCCTGTGAGCATCAGTTTGAATTGATAGAAGGGTACGACTAGCTCCTT<br>TCATCTACACACGTA AAAAGTCCTTCCCTTAATGGATGGTCGCTGTGTGCCCTAAG<br>AATTAAGTAGATAGAACCAACTAGCGCTGGTGTAAGCCTGTTATCTATTAAGAT<br>TCAATACTTTACCCCTGCCCTTCCATGTCTGTGGGCTGTAAAGTCTAACTCTTG<br>GTTTTGGTCAAGGTGAGCCTCTAAGGCTTCCCGATGAAGAAGAGCTGGGGTTTC<br>CAGTGAGAGGCTTGAAATTCAGGTGTAGGCTCTCGCTCTTATCCTGACTGAGTT<br>CAGTGAAAAAGCAATAGGTATTGTTCTTGTTTACAACGTACGCGAAGTCATGCCT<br>TGACATTTTTACTCTTAACATCATTGGAAAGGTTCAAGCTGGTACAATTGTAAC<br>GCCAGCTCTACTATTCTAGTTTCAAAGCGCCAGAGTGTTTATTGCTGGAAAGTC<br>CAGCAATAGGTAGCAGGTCCCTTGTGGAGGCTAGAGATGGTTTCGTTTGGAGAG<br>TAAACCAAGGTCCAGGATGAAGTCAAAGAAGGGGGCTCTGCAACCCGCCTTT<br>AAGATACCCACTAACAGCAACCATTTCTCATCACAGAGGCAAGGCTAACTGAC<br>CTGGAAAGGAGGAGCCTGGGCTGCTGTCCCTCAACGGAAGAACCAAAGAGAA<br>AGAAAAAACAAACAGCACCCGGGAAGCCTGGATCGTACCTGATGTGCCTCGC<br>TGTCTGAGAGTTCACTTATTTATTTATCTATGTATTTATTTATTTATTAATTCCATTG<br>CCCAGATGTTGTTATGTTTATTTTGATATTTAAAGATATGCATTCGCTAATTCACTG<br>TAATATCTTAAAAGGTCATTTTAATATGTTAAAGTTTATTTTAATAATGTTTAATGT<br>GTTCAATTAAGTTATTTAACTTATATAGTTGGAAGGTGATAAATTTTTAAACCTA<br>TTTATTCATTAGTTTCTGGGGAGAGGGTGAGTTGGGAACTAGCTACATCCCACCC<br>ACACAGTGAAAGAGACTGGGGATAAGGGGTGGGGGTGGGGACAAATAGATGCA<br>GTCGGATGGCTTTCATGGAAGGAGTGTGCATGTTACATCATTTTTTTTGTAAGCA<br>CCGAGGAGAGTAGAACAGCTGTTATTTAGGTTTCAGTGTTTGTAACCTGTATGTA<br>CAACATTTTTGATGCTGGATTTCAATGTAATGTTGTGAGTAACCCTTGGACATTTT<br>ATGTCTTCCTCGTAAGGCACAGTGCCTTGCTTAGCAATTGTTTTGTCATGCCTTTT<br>CGTGTCTTGAAGTGGACACATTTATTTATTCATGTATTTTACAAATAACAAAAA<br>TAAAACGTCTGTTAGAAAAA AAAAAAAAAAAAAAAAAAAAAAAAAA |
| lnc-Cxcl2 transcript 2 (5'-3')                                                                                                                                                                                                                                                                                                                                                                                                                                                                                                                                                                                                                                                                                                                                                                                                                                                                                                                                                                                                                                                                                                                                                                                                                                                                                                                                                                                                                                                                                                                                                                                                                                                                                                                                                                                                                                              |
| TGCCCAGACCCTCCTGCCGCCCCATGCTCACCTAAAGAAACCTCGTGCCTTATA<br>ATGATCCCCACATCTCTCTGCAGAGCCACTCTCAAGGGCGGTCAAAAAGTTTGC                                                                                                                                                                                                                                                                                                                                                                                                                                                                                                                                                                                                                                                                                                                                                                                                                                                                                                                                                                                                                                                                                                                                                                                                                                                                                                                                                                                                                                                                                                                                                                                                                                                                                                                                                            |

---

---

CTTGACCCTGAAGCCCCCTGGTTCAGAAAATCATCCAAAAGATACTGAACAAG  
TGAGTCGCGATTTGTGCTTACACCTGACTGGCACCCGATTTCTGAAAATTATAGC  
AGGGAAAATCAAGGTAACTTCAGTTCAGGAACCTGAATTATTATTTTCATTGTT  
AACTTTGTCCTGTGAGCATCAGTTTGAATTGATAGAAGGGTACGACTAGCTCCTT  
TCATCTACACACGTAAAAGTCCTTCCTTAATGGATGGTCGCTGTGTGTCCTAAG  
AATTAAGTAGATAGAACCAACTAGCGCTGGTGTAAGCCTGTTATCTATTAAGAT  
TCAATACTTTACCCCTGCCCTTCCATGTCTGTGGGCTGTAAAGTCTAACTCTTG  
GTTTTGGTCAAGGTGAGCCTCTAAGGCTTCCCGATGAAGAAGAGCTGGGGTTTT  
CAGTGAGAGGCTTGAAATTCAGGTGTAGGCTCTCGCTCTTATCCTGACTGAGTT  
CAGTGAAAAAGCAATAGGTATTGTTCTTGTTTACAACGTACGCGAAGTCATGCCT  
TGACATTTTTACTCTTAACATCATTGGAAGGTTCAAGCTGGTACAATTGTAAC  
GCCAGCTCTACTATTCTAGTTTCAAAGCGCCCAGAGTGTTTATTGCTGGAAAGTC  
CAGCAATAGGTAGCAGGTCCCTTGTGGAGGCTAGAGATGGTTTTCGTTTGGAGAG  
TAAACCAAGGTCCAGGATGAAGTCAAAGAAGGGGGCTCTGCAACCCGCCTTT  
AAGATACCCACTAACAGCAACCATTTTCTCATCACAGAGGCAAGGCTAACTGAC  
CTGGAAAGGAGGAGCCTGGGCTGCTGTCCCTCAACGGAAGAACCAAAGAGAA  
AAAAAAAAAAAAAAAAAAAAAAAAA

---

**Table S2. Differentially expressed genes between *Inc-Cxcl2*<sup>+/+</sup> and *Inc-Cxcl2*<sup>-/-</sup>****MLE-12 cells after VSV infection.**

| Gene_ID            | Gene_Name     | log <sub>2</sub> Fold Change | padj     |
|--------------------|---------------|------------------------------|----------|
| ENSMUSG00000069045 | Ddx3y         | -12.0178                     | 1.19E-25 |
| ENSMUSG00000056673 | Kdm5d         | -10.6469                     | 1.10E-16 |
| ENSMUSG00000068457 | Uty           | -10.0624                     | 2.70E-13 |
| ENSMUSG00000026574 | Dpt           | -5.2229                      | 9.47E-07 |
| ENSMUSG00000057219 | Armc7         | 2.772075                     | 2.22E-05 |
| ENSMUSG00000042244 | Pglyrp3       | 3.825828                     | 2.74E-05 |
| ENSMUSG00000097352 | C920009B18Rik | 8.317647                     | 5.03E-05 |
| ENSMUSG00000024561 | Mbd1          | -3.1801                      | 0.000219 |
| ENSMUSG00000024810 | Ii33          | -2.29913                     | 0.000324 |
| ENSMUSG00000019982 | Myb           | -3.61385                     | 0.00033  |
| ENSMUSG00000087107 | AI662270      | 3.204905                     | 0.000391 |
| ENSMUSG00000021745 | Ptprg         | -4.53405                     | 0.000391 |
| ENSMUSG00000062896 | Rpl31-ps11    | -4.16322                     | 0.007209 |
| ENSMUSG00000041559 | Fmod          | -2.02468                     | 0.007662 |
| ENSMUSG00000023484 | Prph          | 3.322772                     | 0.009482 |
| ENSMUSG00000036545 | Adamts2       | 2.197305                     | 0.009831 |
| ENSMUSG00000090957 | Gm7535        | -2.7301                      | 0.018716 |
| ENSMUSG00000067780 | Pi15          | -2.97685                     | 0.018716 |
| ENSMUSG00000025150 | Cbr2          | 7.388866                     | 0.024055 |
| ENSMUSG00000058427 | Cxcl2         | 2.488358                     | 0.032147 |
| ENSMUSG00000056025 | Clca3a1       | -3.93459                     | 0.032147 |

**Table S3. Inc-Cxcl2-interacting proteins identified by MS analysis in MLE-12 cells.**

| Gene Symbol | Sample 1 |         |          | Sample 2 |         |          |
|-------------|----------|---------|----------|----------|---------|----------|
|             | Score    | Matches | Coverage | Score    | Matches | Coverage |
| Hnrnpab     | 608      | 44(23)  | 26%      | 559      | 54(23)  | 28%      |
| Ddx21       | 372      | 57(24)  | 33%      | 29       | 3(1)    | 5%       |
| Rbmx11      | 327      | 25(12)  | 20%      | 176      | 23(8)   | 20%      |
| Ilf2        | 319      | 30(17)  | 21%      | 345      | 31(17)  | 15%      |
| Eef1a1      | 172      | 11(6)   | 9%       | 57       | 9(3)    | 11%      |
| Hnrnpc      | 74       | 10(4)   | 20%      | 223      | 23(11)  | 24%      |
| Tial1       | 72       | 3(2)    | 7%       | 41       | 3(2)    | 7%       |
| Hnrnpm      | 58       | 6(1)    | 5%       | 39       | 2(1)    | 3%       |
| Ssb         | 46       | 10(3)   | 23%      | 132      | 13(6)   | 16%      |
| Ybx1        | 42       | 5(1)    | 10%      | 48       | 9(2)    | 23%      |
| Ddx5        | 40       | 5(2)    | 6%       | 37       | 7(1)    | 9%       |
| Eif4a3      | 34       | 7(1)    | 9%       | 63       | 8(4)    | 10%      |
| Pcbp1       | 27       | 5(1)    | 10%      | 71       | 8(3)    | 13%      |

**Table S4. La-interacting proteins identified by MS analysis in MLE-12 cells.**

| Sample        | 0 h   |          |          | 12 h  |         |          |
|---------------|-------|----------|----------|-------|---------|----------|
| Gene Symbol   | Score | Matches  | Coverage | Score | Matches | Coverage |
| Myh9          | 3997  | 159(102) | 46%      | 1869  | 94(46)  | 37%      |
| Actb          | 503   | 31(17)   | 42%      | 398   | 28(15)  | 47%      |
| Ssb           | 391   | 20(11)   | 28%      | 387   | 20(11)  | 26%      |
| Myl6          | 380   | 16(11)   | 41%      | 176   | 10(6)   | 30%      |
| My112a        | 355   | 10(8)    | 46%      | 170   | 6(5)    | 34%      |
| Krt6b         | 230   | 12(12)   | 9%       | 188   | 9(6)    | 8%       |
| Krt90         | 225   | 10(8)    | 8%       | 153   | 6(4)    | 6%       |
| Tpm1          | 223   | 8(7)     | 19%      | 72    | 3(2)    | 11%      |
| Krt78         | 201   | 3(3)     | 2%       | 237   | 5(4)    | 5%       |
| Rplp2         | 183   | 5(4)     | 69%      | 160   | 6(4)    | 69%      |
| Rpl12         | 149   | 5(3)     | 40%      | 235   | 6(3)    | 49%      |
| Gm5478        | 130   | 10(4)    | 7%       | 139   | 10(3)   | 6%       |
| Gemin5        | 117   | 6(2)     | 4%       | 45    | 4(0)    | 2%       |
| Pabpc1        | 105   | 6(3)     | 11%      | 207   | 13(8)   | 21%      |
| Gapdh         | 105   | 4(2)     | 15%      | 53    | 3(1)    | 12%      |
| Krt2          | 90    | 7(3)     | 4%       | 81    | 7(2)    | 6%       |
| Krt42         | 82    | 4(3)     | 13%      | 99    | 5(2)    | 17%      |
| Gm49450       | 75    | 1(1)     | 5%       | 61    | 1(1)    | 5%       |
| Alb           | 67    | 1(1)     | 2%       | 59    | 1(1)    | 2%       |
| Eef1a1        | 61    | 5(1)     | 12%      | 70    | 5(1)    | 4%       |
| 2210010C04Rik | 59    | 26(2)    | 8%       | 90    | 23(2)   | 8%       |
| Ddx5          | 55    | 4(2)     | 8%       | 88    | 8(3)    | 15%      |
| Rpl30         | 50    | 2(1)     | 37%      | 66    | 3(1)    | 37%      |
| Rpl4          | 47    | 5(0)     | 19%      | 30    | 3(0)    | 11%      |
| Rpl23         | 47    | 1(1)     | 33%      | 82    | 1(1)    | 33%      |
| Ptbp1         | 42    | 3(1)     | 9%       | 77    | 2(1)    | 5%       |
| Rplp1         | 41    | 1(1)     | 14%      | 52    | 1(1)    | 14%      |
| Rpl6          | 37    | 2(1)     | 3%       | 40    | 2(1)    | 6%       |
| Mybbp1a       | 36    | 4(1)     | 2%       | 98    | 10(2)   | 8%       |
| Mettl3        | 35    | 3(0)     | 1%       | 27    | 4(0)    | 1%       |
| Gm8797        | 34    | 2(0)     | 20%      | 34    | 2(1)    | 32%      |
| Rpl27         | 28    | 3(0)     | 22%      | 34    | 4(1)    | 36%      |
| Npm1          | 25    | 1(0)     | 9%       | 69    | 1(1)    | 4%       |
| Fam98a        | 25    | 1(0)     | 2%       | 26    | 1(0)    | 2%       |

---

|       |    |      |    |    |      |     |
|-------|----|------|----|----|------|-----|
| Rps11 | 21 | 2(0) | 6% | 23 | 2(0) | 18% |
|-------|----|------|----|----|------|-----|

---



**Table S5. Primers used for q-PCR analysis in this study.**

| Name           | Forward (5'-3')             | Reverse (5'-3')               |
|----------------|-----------------------------|-------------------------------|
| lnc-Cxcl2      | CAACGTACGCGAAGTCAT          | ATAAACACTCTGGGCGCT            |
| Rpl32          | TTAAGCGAAACTGGCGGAAA<br>C   | TTGTTGCTCCCATAACCGATG         |
| Cxcl2          | CAGAAGTCATAGCCACTCTCA<br>A  | CTCCTTTCCAGGTCAGTTAGC         |
| Cxcl2 pre-mRNA | TTCCTCGGGCACTCCAGACT        | AAACATCAGCCTCGAATCCG          |
| Ccl2           | TTAAAAACCTGGATCGGAAC<br>CAA | GCATTAGCTTCAGATTTACGG<br>GT   |
| Ifnb1          | ATGAGTGGTGGTTGCAGGC         | TGACCTTTCAAATGCAGTAGA<br>TTCA |
| Tnf            | AAGCCTGTAGCCCACGTCGTA       | GGCACCCTAGTTGGTTGTCT<br>TTG   |
| Cxcl3          | CAGAAGTCATAGCCACTCTC        | TGGACTTGCCGCTCTTCAGT          |
| Ssb            | AAGAATGGCTAGACGATAAA<br>GGC | GCTTGTGTCTTCCTTCATGCT         |
| Actb           | GGCTGTATTCCCCTCCATCG        | CCAGTTGGTAACAATGCCATG<br>T    |
| Air            | ACTTTGACAGAACAATCGGCT       | GAACATTTGCAAAGGACAGT          |
| IAV P3         | GGCCGACTACACTCTCGATGA       | TGTCTTATGGTGAATGACCTG<br>GTTT |
| RPL32          | GCCCAAGATCGTCAAAAAGA<br>GA  | TCCGCCAGTTACGCTTAATTT         |
| lnc-CXCL2-1-1  | AGGCTGGAATGTAGTGGTGC        | CTGGCCACAATGGTTCATGC          |
| lnc-CXCL2-2-1  | CTTGCCTTGCTTGTGTGCTT        | TCTCATACTGGGACAGGGCT          |
| lnc-CXCL2-4-1  | TCCCAAGTAACCACCAGTTGT       | TGTGCCACCATTTCTCATC           |
| CXCL2          | CTGCCAGTGCTTGCAGAC          | CTGGTCAGTTGGATTTGCCA          |
| CXCL8          | CTGATTTCTGCAGCTCTGTG        | TTCACTGGCATCTTCACTG           |
| SSB            | TGGATAGACTTCGTCAGAGG<br>AG  | TCTTTGGCTTTACCCAATGCT<br>T    |
| Cxcl2 proximal | CAGTAGAATGAGGCAG            | GAGAGCTCCTTTTATGC             |

---

|                          |                      |                      |
|--------------------------|----------------------|----------------------|
| κB site                  |                      |                      |
| Cxcl2 distal<br>κB site  | CACCAAGTCTCTGTTTC    | GGAGATGTGTCAAAAGC    |
| Ccl2 proximal<br>κB site | TTACTGGGGGTCCCTTCCCA | GGAGTGGCTCTGCTTTCACT |
| Ccl2 distal<br>κB site   | ATGTGAGAGCGCCACTCTTT | TGGTAGCTCTCTGCCCTGTT |

---

**Table S6. Target sequences of siRNAs used in this study.**

| siRNA                 | Target sequence (5'-3') |
|-----------------------|-------------------------|
| ASO-m-lnc-Cxcl2-1_001 | TCATTTGGAAAGGTTCAAGC    |
| ASO-m-lnc-Cxcl2-1_002 | TCTGCAACCCGCCTTTAAGA    |
| ASO-m-lnc-Cxcl2-1_003 | AAGATACCCACTAACAGCAA    |
| si-m-lnc-Cxcl2-1_001  | GGTCCAGGATGAAGTCAAA     |
| si-m-lnc-Cxcl2-1_002  | GGTTCAAGCTGGTACAATT     |
| si-m-lnc-Cxcl2-1_003  | GGTTTCGTTTGGAGAGTAA     |
| ASO-m-lnc-Cxcl2-2_001 | CTGGCACCCGATTTCTGAAA    |
| ASO-m-lnc-Cxcl2-2_002 | CACGTAAAAGTCCTTCCTTA    |
| ASO-m-lnc-Cxcl2-2_003 | TCCAGTGAGAGGCTTGAAT     |
| si-m-lnc-Cxcl2-2_001  | TCAGGAACCTGAATTATTA     |
| si-m-lnc-Cxcl2-2_002  | CCATGTCTGTGGGCTGTAA     |
| si-m-lnc-Cxcl2-2_003  | GCATCAGTTTGAATTGATA     |
| si-m-Ssb_001          | AGACGATAAAGGCCAAATA     |
| si-m-Ssb_002          | GAAAGTACTAGAAGGACAT     |
| si-m-Ssb_003          | GAGAAGAACCCGCATCAAA     |
| si-m-Ddx5_001         | GCTTGTCGCTTGAAGTCTA     |
| si-m-Ddx5_002         | GGTTCTAAATGAATTCAAA     |
| si-m-Ddx5_003         | GGTCGAAGACAGAGGTTCA     |
| si-m-Ddx21_001        | GAAAGAAGCAAGCGGAGAT     |
| si-m-Ddx21_002        | TCAGTTACGCTTGAAAGA      |
| si-m-Ddx21_003        | TCACAGAAATACAGGAGAA     |
| si-m-Eef1a1_001       | ACCAGCAAATACTATGTGA     |
| si-m-Eef1a1_002       | TCAGAAGAGATACGAGGAA     |
| si-m-Eef1a1_003       | AGAAGAGATACGAGGAAAT     |
| si-m-Eif4a3_001       | CGTGCTATCAAGCAGATAA     |
| si-m-Eif4a3_002       | GGATATCCAGGTTTCGAGAA    |
| si-m-Eif4a3_003       | CTGATGAAATGTTGAACAA     |
| si-m-Hnrnpab_001      | CCCAACACTGGACGATCAA     |
| si-m-Hnrnpab_002      | GGAAGATCCTGTGAAGAAA     |
| si-m-Hnrnpab_003      | GGTTGTTGACTGTACAATA     |
| si-m-Hnrnpc_001       | GGTGTGAAACGATCTGCAG     |
| si-m-Hnrnpc_002       | GTGGATTCTTCTTGAA        |
| si-m-Hnrnpc_003       | GGATGATGACGATAATGAA     |
| si-m-Hnrnpm_001       | CCGAGAGATTGATGTTCTGA    |
| si-m-Hnrnpm_002       | GCTGTGCAAGCAATATCTA     |

|                         |                       |
|-------------------------|-----------------------|
| si-m-Hnrnpm_003         | GCACAGTATTTGTAGCAAA   |
| si-m-Ilf2_001           | GCTTCTCAGTCCACAGTTA   |
| si-m-Ilf2_002           | GGCAGGTAGGATCATATAA   |
| si-m-Ilf2_003           | CAGCTATCTTGCTTCTGAA   |
| si-m-Pcbp1_001          | CTACCAATGCCATCTTTAA   |
| si-m-Pcbp1_002          | CTCACTTTGCCATGATGCA   |
| si-m-Pcbp1_003          | AACTTAATCGGCTGCATAA   |
| si-m-Rbmx11_001         | AGATGCAGCTAGAGATATG   |
| si-m-Rbmx11_002         | AGCAGAGATTACCCAAGCT   |
| si-m-Rbmx11_003         | TACCGTGATTACAGTCATT   |
| si-m-Tial1_001          | ACAAGCAATGACCCATATT   |
| si-m-Tial1_002          | CTGCATTAGCTGCTATGAA   |
| si-m-Tial1_003          | CAACAGTATGGACAGTATA   |
| si-m-Ybx1_001           | GGCGAAGGTTCCCACCTTA   |
| si-m-Ybx1_002           | GGTAGACCAGTGAGACAGA   |
| si-m-Ybx1_003           | GGTGCAGGAGAGCAAGGTA   |
| ASO-h-lnc-CXCL2-4-1_001 | TCTTCCTTACAGTAGAACCC  |
| ASO-h-lnc-CXCL2-4-1_002 | GTGTTCCCTGAATTCTTACCA |
| ASO-h-lnc-CXCL2-4-1_003 | GAGGAACTTCTTTCGAAGTA  |
| si-h-lnc-CXCL2-4-1_001  | TCTGCCAAATGCTGTTCTT   |
| si-h-lnc-CXCL2-4-1_002  | GTAACATGCTCAAGGTGCT   |
| si-h-lnc-CXCL2-4-1_003  | GCACAACCTGGTGTAATTCT  |
| si-h-SSB-1              | GACCAACAAGAATCCCTAA   |
| si-h-SSB-2              | CGGGTGATTTAGATGATCA   |
